# Supplementary material
Source: Springer Nature journal article supplement (https://www.springermedizin.de/resource/supplementary/13002_2007_93_MOESM3_ESM.pdf/9627142)

SAN
  CAU
  PIL
  PIC
  CPO
  MON
  mCl

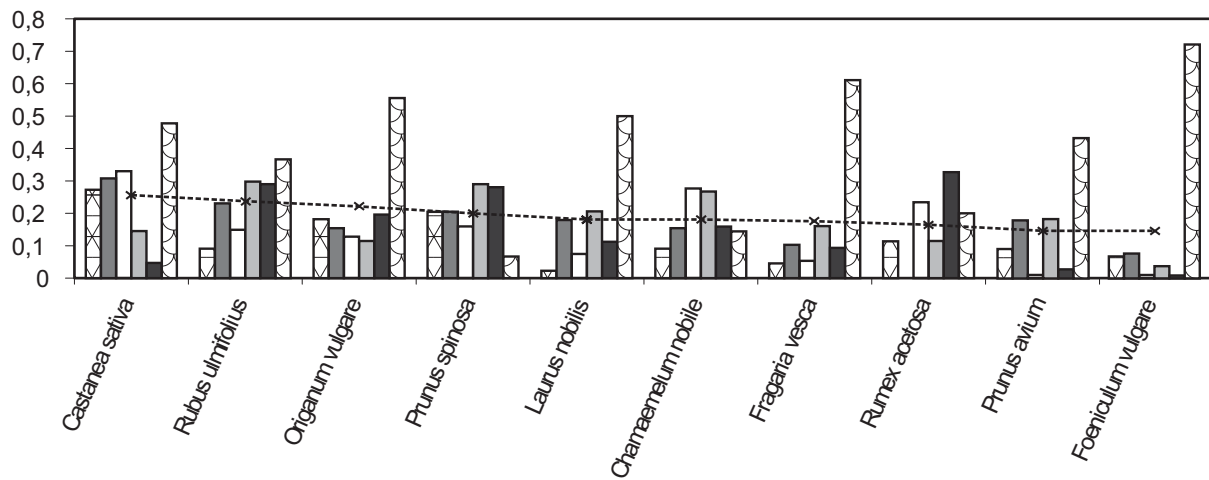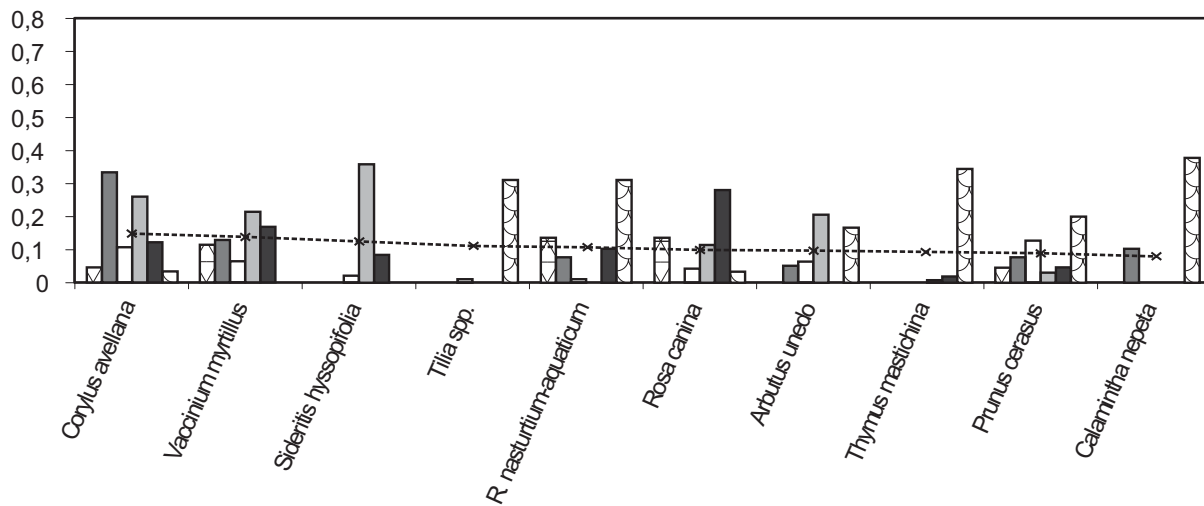

Supplement: MOESM3 [file 9627142]
